# Supplementary material for: Regulation of Glutathione S-Transferase Omega 1 Mediated by Cysteine Residues Sensing the Redox Environment
Source: MDPI journal article supplement (doi:10.3390/ijms25105279), 2024-05-12
Supplement: s1 [file s1]

**Supplementary Table S1.** Primers for site-directed mutagenesis.

| GstO1<br>mutants |         | Sequence (5'-3')                               |
|------------------|---------|------------------------------------------------|
| C32A             | Forward | GTC TAC AGC ATG AGG TTC GCG CCC TTC GCT CAG AG |
|                  | Reverse | CTC TGA GCG AAG GGC GCG AAC CTC ATG CTG TAG AC |
| C90A             | Forward | CGA ATC TGT CAT CAC TGC GGA GTA CCT GGA TGA GG |
|                  | Reverse | CCT CAT CCA GGT ACT CCG CAG TGA TGA CAG ATT CG |
| C191A            | Forward | GAA GCA TTG GAG CTC AAG GAG GCG CTA GCC CAC AC |
|                  | Reverse | GTG TGG GCT AGC GCC TCC TTG AGC TCC AAT GCT TC |
| C236A            | Forward | GCC CCG AGG CCG CAG ATT ATG GGC TC             |
|                  | Reverse | GAG CCC ATA ATC TGC GGC CTC GGG GC             |
